# Supplementary material for: A new strategy to obtain tetranuclear cobalt(ii) metal–organic frameworks based on the [Co4(μ3-OH)2] cluster: synthesis, structures and properties
Source: Royal Society of Chemistry journal article supplement (doi:10.1039/c6dt02895k), 2016-01-01
Supplement: c6dt02895k1.pdf [file c6dt02895k1.pdf]

# Electronic Supplementary Information

## (ESI)

### A new strategy to obtain tetranuclear cobalt(II) metal-organic frameworks based on $[\text{Co}_4(\mu_3\text{-OH})_2]$ cluster: synthesis, structures and properties

Ke Li, Xiu-Xiu Lv, Lu-Lu Shi, Lu Liu, Bao-Long Li\* and Bing Wu

State and Local Joint Engineering Laboratory for Functional Polymeric Materials, College of Chemistry, Chemical Engineering and Materials Science, Soochow University, Suzhou 21512

**Table S1.** Selected bond lengths [ $\text{\AA}$ ] and angles [ $^\circ$ ] for **1-3**.

| <b>1</b>             |            |                     |            |
|----------------------|------------|---------------------|------------|
| Co(1)-O(6)#1         | 2.050(3)   | Co(3)-O(14)         | 1.966(3)   |
| Co(1)-O(13)#1        | 2.064(3)   | Co(3)-O(8)          | 2.106(3)   |
| Co(1)-O(13)          | 2.082(3)   | Co(3)-N(4)#2        | 2.107(3)   |
| Co(1)-O(2A)          | 2.092(5)   | Co(3)-O(3)#1        | 2.142(3)   |
| Co(1)-N(1)           | 2.105(3)   | Co(3)-O(4)#1        | 2.175(3)   |
| Co(1)-O(22)          | 2.160(7)   | Co(3)-O(7)          | 2.258(3)   |
| Co(1)-O(1)           | 2.267(3)   | Co(4)-O(14)         | 1.967(3)   |
| Co(2)-O(5)           | 2.005(3)   | Co(4)-N(5)#2        | 2.097(3)   |
| Co(2)-O(13)          | 2.072(2)   | Co(4)-O(9)          | 2.101(3)   |
| Co(2)-N(2)           | 2.098(3)   | Co(4)-O(11)#3       | 2.120(3)   |
| Co(2)-O(16)          | 2.127(3)   | Co(4)-O(10)         | 2.251(3)   |
| Co(2)-O(15)          | 2.132(3)   | Co(4)-O(12)#3       | 2.251(3)   |
| Co(2)-O(1)#1         | 2.150(3)   |                     |            |
| O(6)#1-Co(1)-O(13)#1 | 96.06(11)  | N(2)-Co(2)-O(1)#1   | 88.58(13)  |
| O(6)#1-Co(1)-O(13)   | 172.49(11) | O(16)-Co(2)-O(1)#1  | 176.97(11) |
| O(13)#1-Co(1)-O(13)  | 80.31(11)  | O(15)-Co(2)-O(1)#1  | 94.52(11)  |
| O(6)#1-Co(1)-O(2A)   | 93.97(18)  | O(14)-Co(3)-O(8)    | 103.95(12) |
| O(13)#1-Co(1)-O(2A)  | 139.64(18) | O(14)-Co(3)-N(4)#2  | 87.56(11)  |
| O(13)-Co(1)-O(2A)    | 93.02(18)  | O(8)-Co(3)-N(4)#2   | 108.53(11) |
| O(6)#1-Co(1)-N(1)    | 86.67(11)  | O(14)-Co(3)-O(3)#1  | 113.78(12) |
| O(13)#1-Co(1)-N(1)   | 111.35(12) | O(8)-Co(3)-O(3)#1   | 133.14(11) |
| O(13)-Co(1)-N(1)     | 88.53(11)  | N(4)#2-Co(3)-O(3)#1 | 100.07(12) |
| O(2A)-Co(1)-N(1)     | 108.18(19) | O(14)-Co(3)-O(4)#1  | 171.70(12) |

|                     |            |                       |            |
|---------------------|------------|-----------------------|------------|
| O(6)#1-Co(1)-O(22)  | 89.4(2)    | O(8)-Co(3)-O(4)#1     | 83.95(11)  |
| O(13)#1-Co(1)-O(22) | 164.2(2)   | N(4)#2-Co(3)-O(4)#1   | 87.48(11)  |
| O(13)-Co(1)-O(22)   | 95.8(2)    | O(3)#1-Co(3)-O(4)#1   | 60.67(10)  |
| O(2A)-Co(1)-O(22)   | 24.7(2)    | O(14)-Co(3)-O(7)      | 96.13(10)  |
| N(1)-Co(1)-O(22)    | 83.7(2)    | O(8)-Co(3)-O(7)       | 60.00(10)  |
| O(6)#1-Co(1)-O(1)   | 90.12(12)  | N(4)#2-Co(3)-O(7)     | 168.48(11) |
| O(13)#1-Co(1)-O(1)  | 82.84(10)  | O(3)#1-Co(3)-O(7)     | 88.45(11)  |
| O(13)-Co(1)-O(1)    | 95.92(11)  | O(4)#1-Co(3)-O(7)     | 90.02(11)  |
| O(2A)-Co(1)-O(1)    | 58.11(18)  | O(14)-Co(4)-N(5)#2    | 88.53(11)  |
| N(1)-Co(1)-O(1)     | 165.69(12) | O(14)-Co(4)-O(9)      | 107.01(11) |
| O(22)-Co(1)-O(1)    | 82.3(2)    | N(5)#2-Co(4)-O(9)     | 96.87(11)  |
| O(5)-Co(2)-O(13)    | 93.83(11)  | O(14)-Co(4)-O(11)#3   | 112.06(11) |
| O(5)-Co(2)-N(2)     | 177.00(12) | N(5)#2-Co(4)-O(11)#3  | 113.59(11) |
| O(13)-Co(2)-N(2)    | 89.00(10)  | O(9)-Co(4)-O(11)#3    | 130.12(10) |
| O(5)-Co(2)-O(16)    | 88.54(13)  | O(14)-Co(4)-O(10)     | 165.70(11) |
| O(13)-Co(2)-O(16)   | 91.55(11)  | N(5)#2-Co(4)-O(10)    | 87.61(10)  |
| N(2)-Co(2)-O(16)    | 92.36(12)  | O(9)-Co(4)-O(10)      | 59.87(9)   |
| O(5)-Co(2)-O(15)    | 90.06(11)  | O(11)#3-Co(4)-O(10)   | 82.07(10)  |
| O(13)-Co(2)-O(15)   | 176.11(10) | O(14)-Co(4)-O(12)#3   | 94.08(10)  |
| N(2)-Co(2)-O(15)    | 87.11(11)  | N(5)#2-Co(4)-O(12)#3  | 173.44(11) |
| O(16)-Co(2)-O(15)   | 88.40(11)  | O(9)-Co(4)-O(12)#3    | 88.13(10)  |
| O(5)-Co(2)-O(1)#1   | 90.66(14)  | O(11)#3-Co(4)-O(12)#3 | 59.85(9)   |
| O(13)-Co(2)-O(1)#1  | 85.59(10)  | O(10)-Co(4)-O(12)#3   | 91.26(10)  |
| <b>2</b>            |            |                       |            |
| Co(1)-O(1)#1        | 2.030(2)   | Co(3)-O(3)            | 2.241(2)   |
| Co(1)-O(5)#2        | 2.163(3)   | Co(3)-O(4)            | 2.166(2)   |
| Co(1)-O(6)#2        | 2.295(3)   | Co(3)-O(8)#6          | 2.046(3)   |
| Co(1)-O(7)          | 2.025(2)   | Co(3)-O(10)           | 2.010(2)   |
| Co(1)-O(21)         | 2.094(2)   | Co(3)-O(13)           | 2.111(2)   |
| Co(1)-N(1)#3        | 2.125(2)   | Co(3)-N(5)            | 2.127(3)   |
| Co(2)-O(2)#1        | 2.158(2)   | Co(4)-O(9)            | 2.123(4)   |
| Co(2)-O(7)#4        | 2.123(2)   | Co(4)-O(10)           | 2.039(2)   |
| Co(2)-O(7)          | 2.085(2)   | Co(4)-O(10)#6         | 2.119(2)   |
| Co(2)-O(11)         | 2.055(2)   | Co(4)-O(14)#6         | 2.042(3)   |
| Co(2)-O(19)         | 2.110(2)   | Co(4)-O(20)           | 2.136(3)   |
| Co(2)-N(2)#5        | 2.148(2)   | Co(4)-N(6)            | 2.147(3)   |
| O(1)#1-Co(1)-O(5)   | 154.81(7)  | O(4)-Co(3)-O(3)       | 59.70(7)   |
| O(1)#1-Co(1)-O(6)#6 | 96.14(7)   | O(10)-Co(3)-O(13)     | 88.61(10)  |
| O(1)#1-Co(1)-O(21)  | 88.41(8)   | O(8)#6-Co(3)-O(3)     | 150.63(7)  |
| O(1)#1-Co(1)-N(1)#3 | 87.63(8)   | O(8)#6-Co(3)-O(4)     | 90.94(7)   |
| O(5)#2-Co(1)-O(6)#2 | 58.72(7)   | O(8)#6-Co(3)-O(13)    | 89.09(7)   |
| O(7)-Co(1)-O(1)#1   | 105.47(7)  | O(8)#6-Co(3)-N(5)     | 89.45(8)   |
| O(7)-Co(1)-O(5)#2   | 99.66(7)   | O(10)-Co(3)-O(3)      | 89.90(7)   |
| O(7)-Co(1)-O(6)#2   | 158.38(7)  | O(10)-Co(3)-O(4)      | 149.17(7)  |

|                     |            |                       |            |
|---------------------|------------|-----------------------|------------|
| O(7)-Co(1)-O(21)    | 93.47(7)   | O(10)-Co(3)-O(8)#6    | 119.36(7)  |
| O(7)-Co(1)-N(1)#3   | 88.49(7)   | O(10)-Co(3)-O(13)     | 88.60(7)   |
| O(21)-Co(1)-O(5)#2  | 88.52(8)   | O(10)-Co(3)-N(5)      | 88.51(7)   |
| O(21)-Co(1)-O(6)#2  | 86.72(7)   | O(13)-Co(3)-O(3)      | 89.25(7)   |
| O(21)-Co(1)-N(1)#3  | 175.93(9)  | O(13)-Co(3)-O(4)      | 86.01(7)   |
| N(1)#3-Co(1)-O(5)#2 | 94.67(8)   | O(13)-Co(3)-N(5)      | 175.60(7)  |
| N(1)#3-Co(1)-O(6)#2 | 92.77(7)   | N(5)-Co(3)-O(3)       | 94.05(8)   |
| O(7)-Co(2)-O(2)#1   | 90.42(6)   | N(5)-Co(3)-O(4)       | 98.16(8)   |
| O(7)#4-Co(2)-O(2)#1 | 96.25(6)   | O(9)-Co(4)-O(20)      | 83.19(7)   |
| O(7)-Co(2)-O(7)#4   | 83.31(7)   | O(9)-Co(4)-N(6)       | 167.64(7)  |
| O(7)-Co(2)-O(19)    | 169.54(8)  | O(10)#6-Co(4)-O(9)    | 96.95(7)   |
| O(7)#4-Co(2)-N(5)#5 | 86.02(7)   | O(10)-Co(4)-O(9)      | 90.35(7)   |
| O(7)-Co(2)-N(2)#5   | 92.94(7)   | O(10)-Co(4)-O(10)#6   | 80.32(7)   |
| O(11)-Co(2)-O(2)#1  | 85.99(7)   | O(10)-Co(4)-O(14)#6   | 169.89(7)  |
| O(11)-Co(2)-O(7)#4  | 172.09(7)  | O(10)#6-Co(4)-O(20)   | 177.04(8)  |
| O(11)-Co(2)-O(7)    | 104.29(7)  | O(10)-Co(4)-O(20)     | 96.73(8)   |
| O(11)-Co(2)-O(19)   | 85.95(8)   | O(10)#6-Co(4)-N(6)    | 94.65(7)   |
| O(11)-Co(2)-N(2)#5  | 91.35(8)   | O(10)-Co(4)-N(6)      | 87.42(7)   |
| O(19)-Co(2)-O(2)#1  | 85.11(7)   | O(14)#6-Co(4)-O(9)    | 93.20(7)   |
| O(19)-Co(2)-O(7)#4  | 86.69(7)   | O(14)#6-Co(4)-O(10)#6 | 89.86(7)   |
| O(19)-Co(2)-N(2)#5  | 91.92(8)   | O(14)#6-Co(4)-O(20)   | 93.08(8)   |
| N(2)#5-Co(2)-O(2)#1 | 176.14(7)  | O(14)#6-Co(4)-N(6)    | 91.06(8)   |
|                     |            | O(20)-Co(4)-N(6)      | 85.00(8)   |
|                     |            | <b>3</b>              |            |
| Co(1)-O(7)#1        | 2.056(3)   | Co(2)-O(7)            | 1.991(3)   |
| Co(1)-O(1)          | 2.069(3)   | Co(2)-O(6)#2          | 2.045(3)   |
| Co(1)-O(7)          | 2.097(3)   | Co(2)-O(2)            | 2.112(3)   |
| Co(1)-N(1)          | 2.123(4)   | Co(2)-O(3)#3          | 2.122(3)   |
| Co(1)-O(5)#2        | 2.130(3)   | Co(2)-N(2)#1          | 2.154(4)   |
| Co(1)-O(8)          | 2.139(4)   | Co(2)-O(4)#3          | 2.319(3)   |
| O(7)#1-Co(1)-O(1)   | 173.20(12) | O(7)-Co(2)-O(6)#2     | 119.55(12) |
| O(7)#1-Co(1)-O(7)   | 80.44(12)  | O(7)-Co(2)-O(2)       | 88.88(13)  |
| O(1)-Co(1)-O(7)     | 93.08(12)  | O(6)#2-Co(2)-O(2)     | 85.44(13)  |
| O(7)#1-Co(1)-N(1)   | 87.15(13)  | O(7)-Co(2)-O(3)#3     | 143.83(12) |
| O(1)-Co(1)-N(1)     | 91.02(14)  | O(6)#2-Co(2)-O(3)#3   | 96.61(13)  |
| O(7)-Co(1)-N(1)     | 91.88(13)  | O(2)-Co(2)-O(3)#3     | 94.65(13)  |
| O(7)#1-Co(1)-O(5)#2 | 92.21(12)  | O(7)-Co(2)-N(2)#1     | 87.89(13)  |
| O(1)-Co(1)-O(5)#2   | 90.52(13)  | O(6)#2-Co(2)-N(2)#1   | 85.60(14)  |
| O(7)-Co(1)-O(5)#2   | 96.07(12)  | O(2)-Co(2)-N(2)#1     | 167.43(13) |
| N(1)-Co(1)-O(5)#2   | 171.81(13) | O(3)#3-Co(2)-N(2)#1   | 95.13(14)  |
| O(7)#1-Co(1)-O(8)   | 91.36(13)  | O(7)-Co(2)-O(4)#3     | 85.39(12)  |
| O(1)-Co(1)-O(8)     | 95.02(14)  | O(6)#2-Co(2)-O(4)#3   | 154.85(13) |
| O(7)-Co(1)-O(8)     | 171.47(13) | O(2)-Co(2)-O(4)#3     | 92.42(13)  |
| N(1)-Co(1)-O(8)     | 85.34(15)  | O(3)#3-Co(2)-O(4)#3   | 58.53(12)  |

|                   |           |                     |           |
|-------------------|-----------|---------------------|-----------|
| O(5)#2-Co(1)-O(8) | 86.51(14) | N(2)#1-Co(2)-O(4)#3 | 99.42(14) |
|-------------------|-----------|---------------------|-----------|

Symmetry transformations used to generate equivalent atoms: #1 -x, -y+1, -z; #2 -x+1, -y+1, -z+1; #3 -x, -y-1, -z+1 for **1**; #1 -x+1, -y+2, -z+2; #2 x, y, z+1; #3 x-1, y+1, z+1; #4 -x+1, -y+2, -z+3; #5 -x+2, -y+1, -z+2; #6 -x+1, -y+1, -z+2; #7 x, y, z-1; #8 x+1, y-1, z-1 for **2**; #1 -x, -y+1, -z+1; #2 x-1/2, -y+1/2, z-1/2; #3 x+1/2, -y+1/2, z-1/2; #4 x-1/2, -y+1/2, z+1/2; #5 x+1/2, -y+1/2, z+1/2; #6 -x+1, -y+1, -z+2 for **3**.

**Table S2.** Hydrogen bonds for **1-3** (Å and °).

| D-H...A                 | d(D-H)    | d(H...A)  | d(D...A)  | <(DHA) |
|-------------------------|-----------|-----------|-----------|--------|
| <b>1</b>                |           |           |           |        |
| O(13)-H(1W)...O(21)     | 0.895(19) | 2.10(2)   | 2.963(9)  | 160(4) |
| O(14)-H(2W)...O(16)#4   | 1.049(16) | 2.463(17) | 3.511(4)  | 177(3) |
| O(15)-H(3W)...O(18)     | 0.884(18) | 1.87(2)   | 2.721(4)  | 161(4) |
| O(15)-H(4W)...O(12)#5   | 0.881(18) | 1.91(2)   | 2.770(4)  | 164(4) |
| O(16)-H(5W)...O(19)#6   | 0.880(19) | 1.84(2)   | 2.703(5)  | 168(4) |
| O(16)-H(6W)...O(12)#5   | 0.891(19) | 1.93(2)   | 2.768(4)  | 157(4) |
| O(17)-H(7W)...O(7)#6    | 0.91(2)   | 2.30(2)   | 2.926(5)  | 125(2) |
| O(17)-H(8W)...O(22)     | 0.92(2)   | 1.82(5)   | 2.611(9)  | 143(6) |
| O(18)-H(9W)...O(10)#5   | 0.893(19) | 1.96(2)   | 2.846(4)  | 173(5) |
| O(18)-H(10W)...O(4)#1   | 0.889(19) | 1.94(3)   | 2.788(4)  | 160(5) |
| O(19)-H(11W)...O(22)#4  | 0.92(2)   | 1.54(3)   | 2.441(10) | 165(6) |
| O(19)-H(12W)...O(7)     | 0.90(2)   | 1.85(3)   | 2.735(5)  | 167(6) |
| <b>2</b>                |           |           |           |        |
| O(19)-H(19A)...O(5)#1   | 0.91      | 1.91      | 2.717(3)  | 147(2) |
| O(20)-H(20B)...O(17)#2  | 0.93      | 2.11      | 2.921(8)  | 145(8) |
| O(20)-H(20B)...O(17A)#2 | 0.93      | 2.57      | 3.32(2)   | 137(6) |
| O(21)-H(21B)...O(12)    | 0.89      | 1.77      | 2.628(3)  | 161(4) |
| <b>3</b>                |           |           |           |        |
| O(7)-H(7)...O(5)#1      | 0.887(17) | 2.71(2)   | 3.015(3)  | 102(2) |
| O(8)-H(8B)...O(4)#2     | 0.858(17) | 2.25(4)   | 2.992(3)  | 144(3) |

Symmetry transformations used to generate equivalent atoms: #1 -x, -y+1, -z; #2 -x+1, -y+1, -z+1; #3 -x, -y-1, -z+1; #4 x, y-1, z; #5 -x, -y, -z+1; #6 x, y+1, z for **1**; #1 -x, -y+2, -z+2; #2 x+1, y, z; #3 x, y-1, z; #4 -x+1, -y+1, -z+1; #5 -x+2, -y+1, -z+2; for **2**; #1 -x+1/2, y+1/2, -z+3/2; #2 -x-1/2, y+1/2, -z+3/2 for **3**.

**Table 3.** The bond angles and the atom distances selected from different coordination quadrangle form by triazole ligands.

| Compound                                                                                                                                                                                                         | $\angle$ M-N-N ( $^{\circ}$ ) | d(M-N) ( $\text{\AA}$ ) | d(M-M) ( $\text{\AA}$ ) | d(N-N) ( $\text{\AA}$ ) | 1,2,4-Triazole ligand                                                               | Ref.      |
|------------------------------------------------------------------------------------------------------------------------------------------------------------------------------------------------------------------|-------------------------------|-------------------------|-------------------------|-------------------------|-------------------------------------------------------------------------------------|-----------|
| <b>1</b>                                                                                                                                                                                                         | 121.889,121.540               | 2.098,2.106             | 3.570                   | 1.377                   | 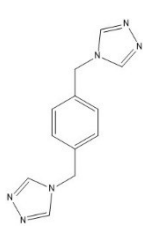 | This work |
|                                                                                                                                                                                                                  | 118.889,120.033               | 2.107,2.097             | 3.468                   | 1.384                   |                                                                                     |           |
| <b>2</b>                                                                                                                                                                                                         | 118.641,120.235               | 2.145,2.126             | 3.532                   | 1.384                   |                                                                                     |           |
|                                                                                                                                                                                                                  | 120.444,119.475               | 2.122,2.147             | 3.511                   | 1.372                   |                                                                                     |           |
| <b>3</b>                                                                                                                                                                                                         | 119.870,119.372               | 2.154,2.123             | 3.530                   | 1.389                   |                                                                                     |           |
| $\{[\text{Cu}(\text{L})(\text{ClO}_4)] \cdot \text{DMF} \cdot \text{H}_2\text{O}\}_n$                                                                                                                            | 126.332,127.088               | 2.028,2.043             | 3.780                   | 1.377                   |                                                                                     |           |
| $\{[\text{Cu}_2(\text{L})_2(\text{ClO}_4)_2] \cdot 4\text{DMF} \cdot \text{H}_2\text{O}\}_n$                                                                                                                     | 123.795,124.730               | 2.031,2.025             | 3.663                   | 1.373                   |                                                                                     |           |
| $\{[\text{Cu}(\text{L})(\text{ClO}_4)] \cdot \text{DMA} \cdot \text{H}_2\text{O}\}_n$                                                                                                                            | 124.253,124.113               | 2.023,2.021             | 3.663                   | 1.386                   |                                                                                     |           |
| $\{[\text{Cu}(\text{L})(\text{ClO}_4)] \cdot \text{NMP} \cdot \text{H}_2\text{O}\}_n$                                                                                                                            | 128.607,127.390               | 2.068,2.058             | 3.959                   | 1.379                   |                                                                                     |           |
| $\{[\text{Cu}(\text{L})(\text{ClO}_4)] \cdot 3\text{NMP}\}_n$                                                                                                                                                    | 126.833,123.174               | 2.037,2.023             | 3.736                   | 1.399                   |                                                                                     |           |
|                                                                                                                                                                                                                  | 125.098,125.036               | 2.057,2.031             |                         | 1.387                   |                                                                                     |           |
| $\{[\text{Cu}_2(2\text{a})(\text{Br})_2] \cdot \text{DMF}\}_n$                                                                                                                                                   | 122.620                       | 1.970                   | 3.515                   | 1.390                   |                                                                                     |           |
| $\{[\text{Ag}_2(2\text{a})(\text{NO}_3)_2] \cdot \text{NMP}\}_n$                                                                                                                                                 | 123.620,121.916               | 2.195,2.206             | 3.753                   | 1.368                   |                                                                                     |           |
| $\{[\text{Cu}_2(2\text{a})(\text{SO}_4)(\text{OH})_2(\text{H}_2\text{O})_2] \cdot \text{H}_2\text{O}\}_n$                                                                                                        | 119.836,119.604               | 1.996,1.984             | 3.362                   | 1.388                   |                                                                                     |           |
|                                                                                                                                                                                                                  | 121.158,120.185               | 1.986,1.990             | 3.417                   |                         |                                                                                     |           |
| $\{[\text{Cu}_2(2\text{b})(\text{Br})_2] \cdot \text{DMF}\}_n$                                                                                                                                                   | 123.120                       | 1.985                   | 3.546                   | 1.377                   |                                                                                     |           |
| $\{[\text{Ag}_2(2\text{c})(\text{NO}_3)_2] \cdot \text{NMP}\}_n$                                                                                                                                                 | 125.175,125.975               | 2.149,2.144             | 3.945                   | 1.420                   |                                                                                     |           |
| $\{[\text{Cu}_4(\text{OH})_2(\text{H}_2\text{O})_2][\text{Cu}_4(\text{OH})_2](\text{tr}2\text{pr})_2(\text{Hadt}c)_4] \cdot 2\text{H}_2\text{O}\}_n$                                                             | 120.085,120.795               | 1.988,2.009             | 3.392                   | 1.367                   |                                                                                     |           |
|                                                                                                                                                                                                                  | 119.941,123.433               | 1.997,1.983             | 3.459                   | 1.369                   |                                                                                     |           |
| $\{[\text{Cu}_4(\text{OH})_2(\text{tr}2\text{ad})_2(\text{Hadt}c)_2(\text{H}_2\text{O})_2] \cdot 3\text{H}_2\text{O}\}_n$                                                                                        | 109.828,120.766               | 2.334,1.987             | 3.342                   | 1.382                   |                                                                                     |           |
|                                                                                                                                                                                                                  | 112.858,120.563               | 2.271,1.981             | 3.331                   | 1.379                   |                                                                                     |           |
| $[\text{Cu}_3(\mu_2\text{-OH})(\mu\text{-adetrz})_2(\text{piv})_5(\text{H}_2\text{O})] \cdot 6.5\text{H}_2\text{O}$                                                                                              | 115.530,118.174               | 2.260,1.988             | 3.339                   | 1.389                   |                                                                                     |           |
|                                                                                                                                                                                                                  | 115.587,116.895               | 2.017,2.028             | 3.189                   | 1.398                   |                                                                                     |           |
| $[\text{Cu}_4(\mu_3\text{-OH})_2(\mu\text{-atr}z)_2(\mu\text{-piv})_4(\text{piv})_2] \cdot 2\text{MeOH} \cdot \text{H}_2\text{O}$                                                                                | 124.901,119.161               | 1.956,2.013             | 3.393                   | 1.289                   |                                                                                     |           |
| $[\text{Cu}_4(\mu_3\text{-OH})_2(\mu\text{-tbtr}z)_2(\mu\text{-piv})_2(\text{piv})_4] \cdot 4\text{H}_2\text{O}$                                                                                                 | 120.592,119.648               | 1.981,1.982             | 3.389                   | 1.375                   |                                                                                     |           |
| $[\text{Cu}_4(\mu_3\text{-O})_2(\mu\text{-admtr}z)_4(\text{admtr}z)_2(\mu\text{-piv})_2(\text{piv})_2] \cdot 2[\text{Cu}_2(\mu\text{-H}_2\text{O})(\mu\text{-admtr}z)(\text{piv})_4] \cdot 13\text{H}_2\text{O}$ | 116.554,118.947               | 2.044,1.992             | 3.274                   | 1.354                   |                                                                                     |           |
|                                                                                                                                                                                                                  | 114.177,111.682               | 2.008,2.450             | 3.278                   | 1.410                   |                                                                                     |           |
| $\{[\text{Cd}(\mu_2\text{-L})(\mu_4\text{-L})](\text{BF}_4)_2\}_n$                                                                                                                                               | 129.007,123.684               | 2.303,2.329             | 4.136                   | 1.388                   |                                                                                     |           |
|                                                                                                                                                                                                                  | 125.604,125.006               | 2.382,2.335             |                         | 1.408                   |                                                                                     |           |
|                                                                                                                                                                                                                  | 126.126,124.870               | 2.333,2.385             |                         | 1.388                   |                                                                                     |           |
| $\{[\text{Cd}(\mu_2\text{-L})(\mu_4\text{-L})](\text{ClO}_4)_2\}_n$                                                                                                                                              | 128.371,124.661               | 2.316,2.305             | 4.155                   | 1.391                   |                                                                                     |           |
|                                                                                                                                                                                                                  | 127.250,123.666               | 2.386,2.347             |                         | 1.399                   |                                                                                     |           |

|                                                                                                                                                                             |                 |             |       |       |                                                                                       |     |
|-----------------------------------------------------------------------------------------------------------------------------------------------------------------------------|-----------------|-------------|-------|-------|---------------------------------------------------------------------------------------|-----|
|                                                                                                                                                                             | 125.173,126.317 | 2.386,2.356 |       | 1.381 |                                                                                       |     |
| $\{[\text{Cd}_3(\mu_3\text{-L})_6](\text{NO}_3)_6\}_n$                                                                                                                      | 123.172,128.986 | 2.335,2.350 | 4.140 | 1.391 |                                                                                       |     |
| $\{[\text{Zn}_4\text{L}_2(\mu_2\text{-O})_2(\text{H}_2\text{O})_5]\cdot 3\text{H}_2\text{O}\}_n$                                                                            | 116.283,114.983 | 2.060,2.069 | 3.184 | 1.391 |    | 15b |
|                                                                                                                                                                             | 116.224,112.345 | 2.034,2.024 | 3.136 | 1.422 |                                                                                       |     |
| $\{[\text{Co}(\text{atz})(\text{L}1)_{0.5}]\cdot \text{DMF}\}_n$                                                                                                            | 124.025,130.879 | 2.005,2.032 | 3.861 | 1.405 |    | 15c |
| $\{[\text{Co}(\text{atz})(\text{L}2)_{0.5}]\cdot \text{DMF}\}_n$                                                                                                            | 132.043,122.586 | 2.045,1.996 | 3.867 | 1.396 |                                                                                       |     |
| $[\text{Fe}_2(\mu_2\text{-L})_3(\text{L})_2(\text{NCS})_4]\cdot \text{CH}_3\text{OH}$<br>$\cdot \text{CH}_3\text{CH}_2\text{OH 100K}$                                       | 122.987,129.208 | 2.235,2.031 | 3.919 | 1.406 |    | 15d |
|                                                                                                                                                                             | 122.271,130.055 | 2.198,2.021 |       | 1.428 |                                                                                       |     |
|                                                                                                                                                                             | 124.676,127.825 | 2.210,2.040 |       | 1.401 |                                                                                       |     |
| $[\text{Fe}_2(\mu_2\text{-L})_3(\text{L})_2(\text{NCS})_4]\cdot \text{CH}_3\text{OH}$<br>$\cdot \text{CH}_3\text{CH}_2\text{OH 296K}$                                       | 126.041,127.084 | 2.208,2.213 | 3.998 | 1.364 |                                                                                       |     |
|                                                                                                                                                                             | 127.427,125.718 | 2.198,2.217 |       | 1.366 |                                                                                       |     |
|                                                                                                                                                                             | 128.877,123.772 | 2.195,2.225 |       | 1.380 |                                                                                       |     |
| $[\text{Fe}_2(\mu_2\text{-L})_3(\text{L})_2(\text{NCS})_4]\cdot 2\text{CH}_3\text{CH}_2\text{OH}$                                                                           | 124.506,125.934 | 2.065,2.101 | 3.804 | 1.389 |                                                                                       |     |
|                                                                                                                                                                             | 125.776,125.067 | 2.084,2.098 |       | 1.376 |                                                                                       |     |
|                                                                                                                                                                             | 127.373,122.890 | 2.059,2.128 |       | 1.385 |                                                                                       |     |
| $[\text{Ni}_3(\mu_2\text{-L})_6(\text{L})_4(\text{H}_2\text{O})_2](\text{NO}_3)_6\cdot 15.5\text{H}_2\text{O}$                                                              | 124.782,125.391 | 2.093,2.050 | 3.772 | 1.390 |                                                                                       |     |
|                                                                                                                                                                             | 124.092,125.950 | 2.076,2.066 |       | 1.391 |                                                                                       |     |
|                                                                                                                                                                             | 124.109,125.165 | 2.111,2.060 |       | 1.399 |                                                                                       |     |
| $\{[\text{Cu}_3(\mu_3\text{-OH})][\text{Cu}_3(\mu_3\text{-O})][(\mu_4\text{-btr})_3(\text{H}_2\text{O})_4(\text{OH})_2\text{Cl}_6]\text{Cl}\cdot 0.5\text{H}_2\text{O}\}_n$ | 118.772,121.506 | 2.003,1.996 | 3.406 | 1.386 |  | 15e |
| $\{[\text{Cu}_3(\mu_3\text{-OH})]_2[(\mu_3\text{-btr})_6(\mu_4\text{-btr})(\mu\text{-Br})\text{Br}_4]\text{Br}_5\cdot 6\text{H}_2\text{O}\}_n$                              | 120.835,120.835 | 2.000,2.000 | 3.447 | 1.396 |                                                                                       |     |
|                                                                                                                                                                             | 120.181,120.696 | 2.012,2.212 | 3.414 | 1.373 |                                                                                       |     |
| $\{[\text{Cu}_3(\mu_3\text{-OH})]_2[(\mu_3\text{-btr})_6(\mu_4\text{-btr})(\mu\text{-Cl})\text{Cl}_4]\text{Cl}_5\cdot 8\text{H}_2\text{O}\}_n$                              | 120.431,119.758 | 2.047,2.015 | 3.437 | 1.397 |                                                                                       |     |
|                                                                                                                                                                             | 116.837,118.234 | 2.338,2.108 |       | 1.376 |                                                                                       |     |
|                                                                                                                                                                             | 120.370,119.225 | 2.015,2.044 | 3.447 | 1.400 |                                                                                       |     |
|                                                                                                                                                                             | 120.793,121.924 | 1.998,2.135 | 3.586 | 1.393 |                                                                                       |     |
|                                                                                                                                                                             | 121.525,113.483 | 2.055,2.416 | 3.455 | 1.386 |                                                                                       |     |
|                                                                                                                                                                             | 118.590,121.354 | 2.013,2.107 |       | 1.395 |                                                                                       |     |
|                                                                                                                                                                             | 121.675,122.809 | 2.037,2.055 | 3.571 | 1.387 |                                                                                       |     |
| 119.095,121.110                                                                                                                                                             | 2.038,2.038     | 3.432       | 1.378 |       |                                                                                       |     |

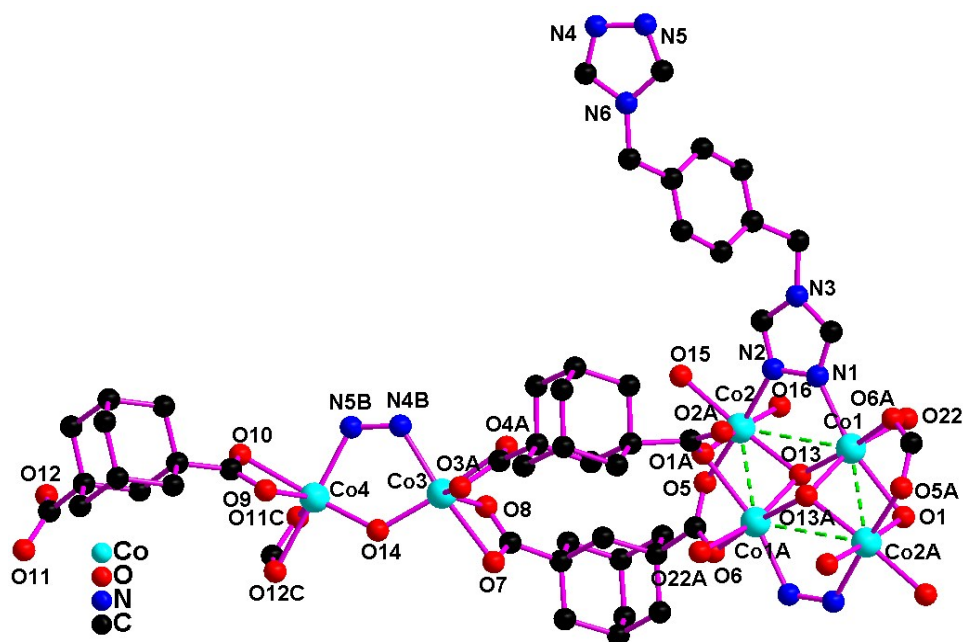

**Fig. S1.** The coordination environment of the tetranuclear cobalt(II)  $[\text{Co}_4(\mu_3\text{-OH})_2]$  and binuclear cobalt(II)  $[\text{Co}_2(\mu_2\text{-OH})]$  in **1**. Symmetry codes: A  $-x, -y+1, -z$ ; B  $-x+1, -y+1, -z+1$ ; C  $-x, -y-1, -z+1$ ; D  $x, y-1, z$ ; E  $-x, -y, -z+1$ ; F  $x, y+1, z$ .

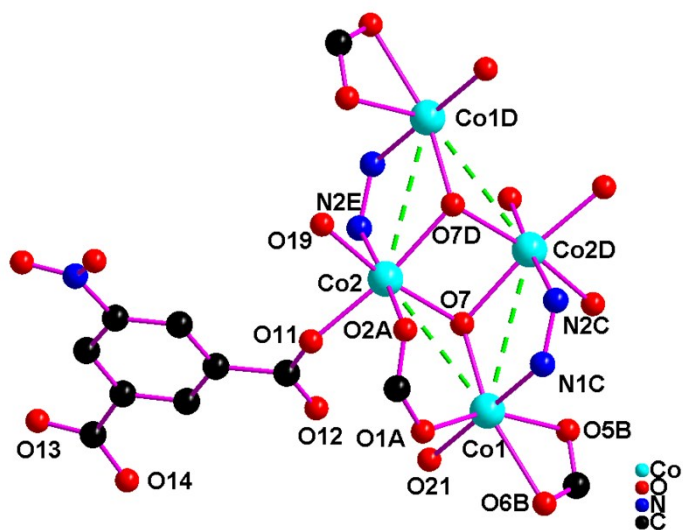

**Fig. S2.** The first kind of tetranuclear cobalt(II) cluster in **2**. Symmetry codes: A  $1-x, 2-y, 2-z$ ; B  $x, y, 1+z$ ; C  $-1+x, 1+y, 1+z$ ; D  $1-x, 2-y, 3-z$ ; E  $2-x, 1-y, 2-z$ ; F  $1-x, 1-y, 2-z$ ; G  $x, y, -1+z$ ; H  $1+x, -1+y, -1+z$ .

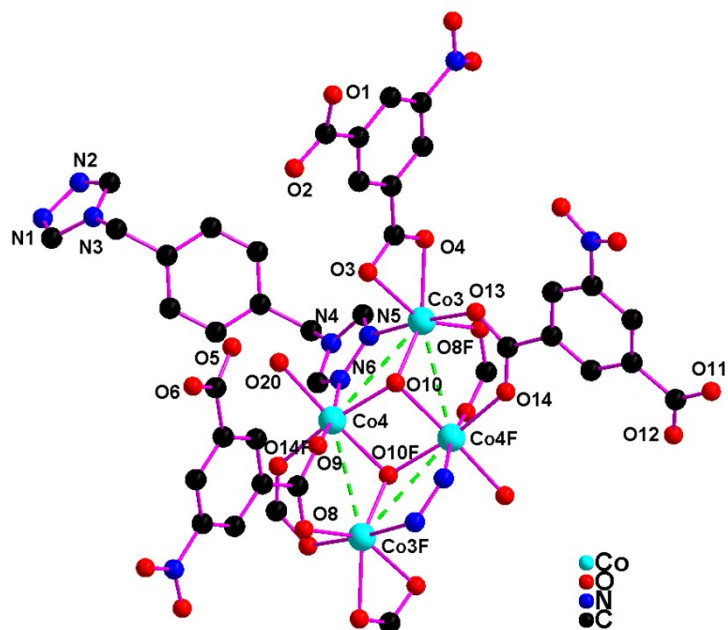

Fig. S3. The second kind of the tetranuclear cobalt(II) cluster in **2**.

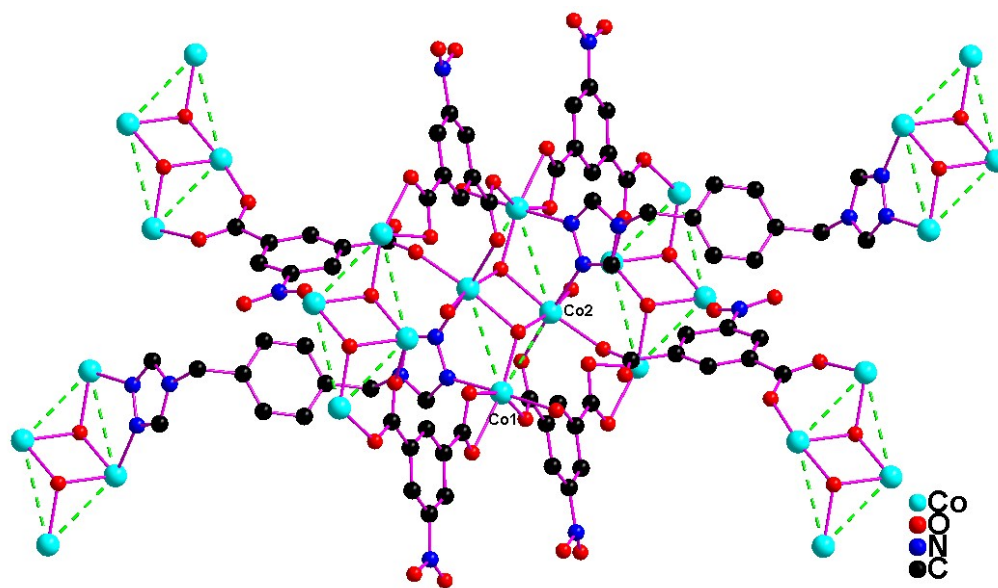

Fig. S4. The first kind of tetranuclear unit connects six tetranuclear units in **2**.



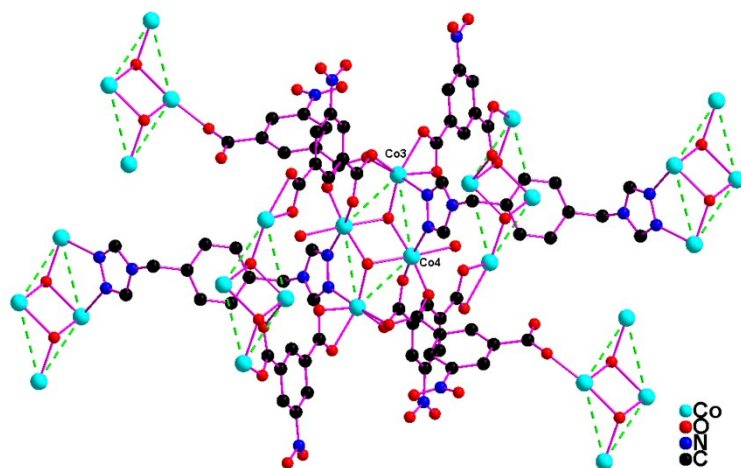

**Fig. S5.** The second kind of tetranuclear unit connects six tetranuclear units in **2**.

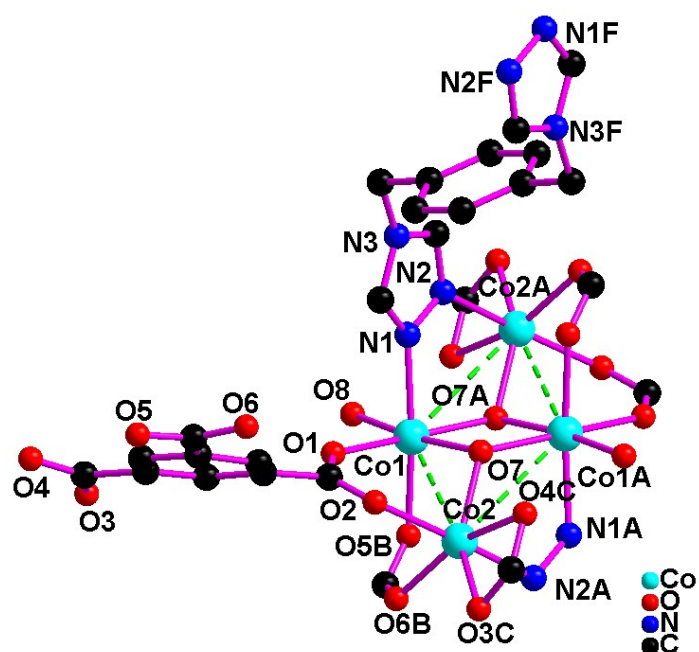

**Fig. S6.** The coordination environment of the tetranuclear cobalt(II) cluster in **3**. Symmetry codes: A  $-x, -y+1, -z+1$ ; B  $x-1/2, -y+1/2, z-1/2$ ; C  $x+1/2, -y+1/2, z-1/2$ ; D  $x-1/2, -y+1/2, z+1/2$ ; E  $x+1/2, -y+1/2, z+1/2$ ; F  $-x+1, -y+1, -z+2$ ; G  $-x+1/2, y+1/2, -z+3/2$ ; H  $-x-1/2, y+1/2, -z+3/2$ ; I  $1+x, y, 1+z$ .

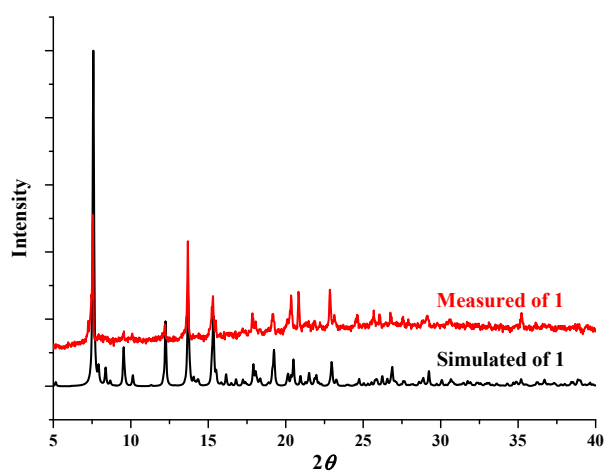

**Fig. S7.** PXRD patterns of compound 1.

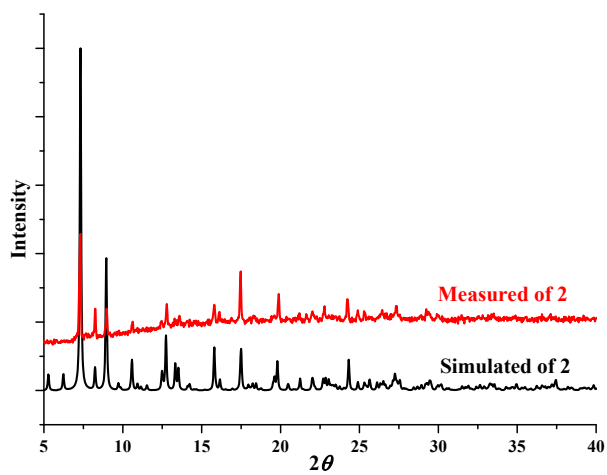

**Fig. S8.** PXRD patterns of compound 2.

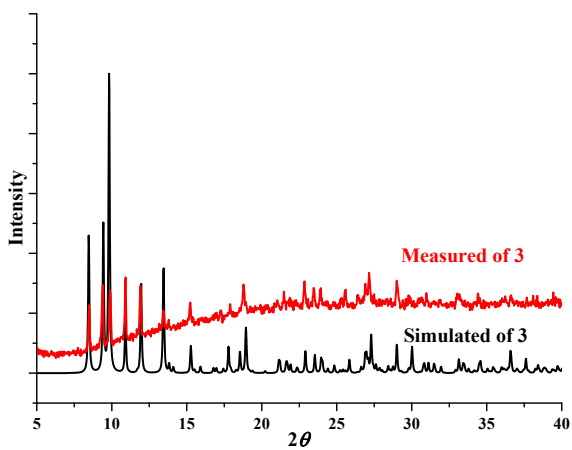

**Fig. S9.** PXRD patterns of compound **3**.

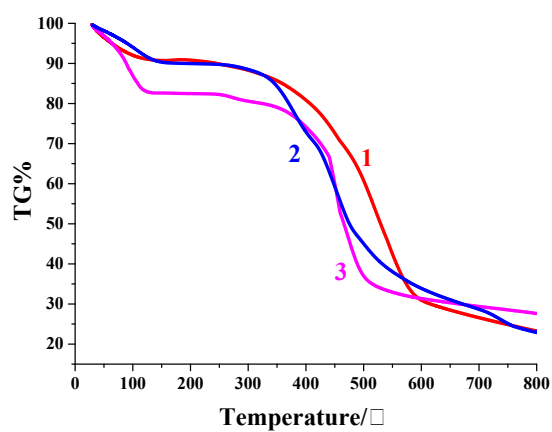

**Fig. S10.** TG vs Temperature curve of **1-3**.
